# Supplementary material
Source: MDPI journal article supplement (https://www.mdpi.com/2813-2998/2/1/3)
Supplement: s1 [file s1]

# Supplementary Materials: Isolation and Characterization of Prophylactic Antimalarial Agents from *Ochna kibbiensis* Leaves

Amina J. Yusuf, Musa I. Abdullahi, Ibrahim Nasir, Abdulmajeed Yunusa, Celestina O. Alebiosu and Abubakar A. Muhammad

**Table S1.** Molecular interactions of Stigmasterol,  $\beta$ -sitosterol, and NADH with p $\beta$ LDH

| Compound name                       | Compound ID | Interactions                                          |                                                                                                                                                                                                                     |
|-------------------------------------|-------------|-------------------------------------------------------|---------------------------------------------------------------------------------------------------------------------------------------------------------------------------------------------------------------------|
|                                     |             | H-Bond                                                | Hydrophobic                                                                                                                                                                                                         |
| Stigmasterol                        | 5280794     | Asp53                                                 | Gly27, Ser28, Gly29, Met30, Ile31, Ile54, Val55, Met58, Thr97, Ala98, Gly99, Phe100, Thr101, Trp107, Arg109, Val138, Thr139, Asn140, Leu163, Leu167, Arg171, His195, Ala236, Val240, Ser245, Pro246, Tyr247, Pro250 |
| $\beta$ -Sitosterol                 | 222284      | Asp53                                                 | Gly27, Ser28, Gly29, Met30, Ile31, Ile54, Val55, Met58, Thr97, Ala98, Gly99, Phe100, Thr101, Trp107, Arg109, Val138, Thr139, Asn140, Val142, Leu163, Gly164, Leu167, Arg171, His195, Ala236, Pro246, Tyr247, Por250 |
| NADH<br>(Co-crystallized<br>ligand) | 439153      | Gly29, Met30, Ile31, Asp53,<br>Phe100, Asn140, His195 | Gly27, Ser28, Gly32, Val55, Ile54, Met58, Thr97, Ala98, Gly99, Thr101, Ile119, Ile123, Val138, Thr139, Leu163, Leu167, Arg171, Pro246, Tyr247, Pro250                                                               |
